# Supplementary material for: Imidazolium Ionic Liquid Functionalized Carbon Nanotubes for Improved Interfacial Charge Transfer and Simultaneous Determination of Dihydroxybenzene Isomers
Source: PubMed Central journal article supplement (PMC6274356; doi:10.3390/molecules21050617), 2016-05-14
Supplement: molecules-21-00617-s001.pdf [file molecules-21-00617-s001.pdf]

# Supplementary Materials: Imidazolium Ionic Liquid Functionalized Carbon Nanotubes for Improved Interfacial Charge Transfer and Simultaneous Determination of Dihydroxybenzene Isomers

Huan Wei, Xiao-Shuai Wu, Guo-Yun Wen and Yan Qiao

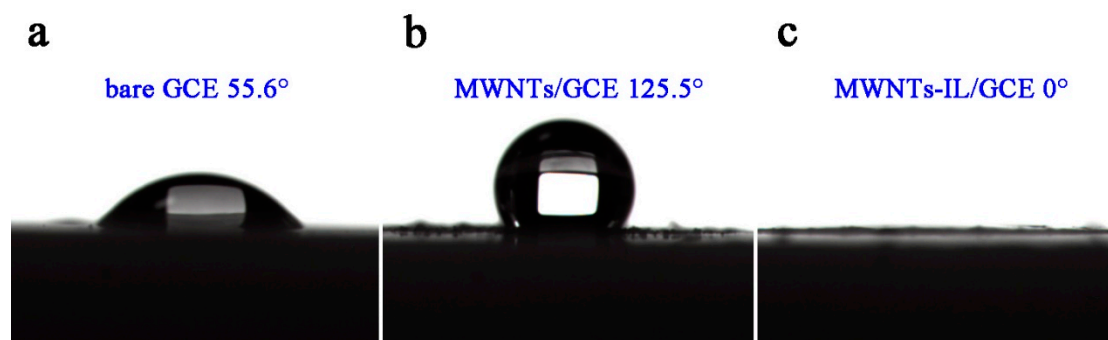

Figure S1. Water contact angle of bare GCE (a), MWNTs/GCE (b) and MWNTs-IL/GCE (c).

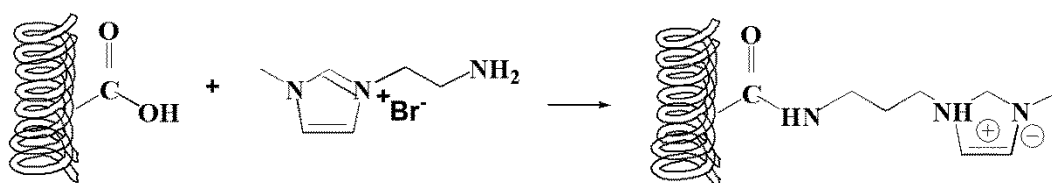

Figure S2. Scheme of the reaction for amine-terminated IL and functionalized MWNT.

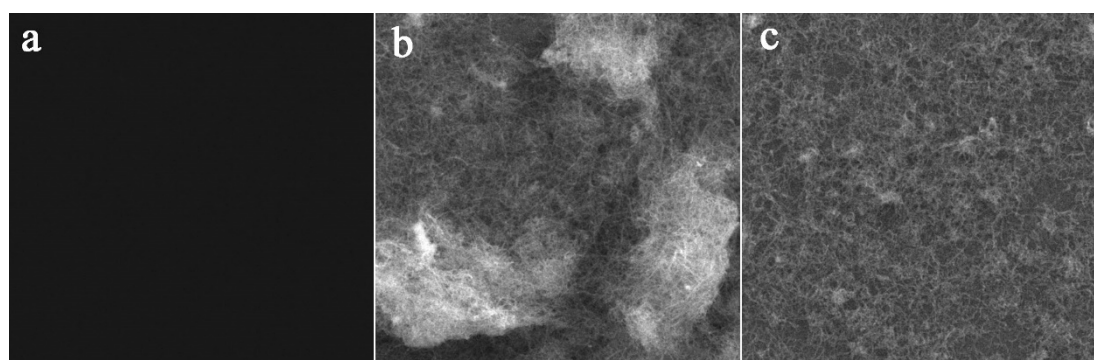

Figure S3. SEM images of bare GCE (a), MWNTs/GCE (b) and MWNTs-IL/GCE (c).
